# Supplementary material for: Exposure to the Four First-Line Anti-Tuberculosis Drugs and Treatment Outcomes: A Target Trial Emulation Study in Ghana
Source: Research Square preprint supplement (doi:10.21203/rs.3.rs-9255541/v1), 2026-04-10
Supplement: Supplementary file 1 [file 5415ae90190882a49f649e6f.docx]

**Table S2**: Baseline characteristics by Treatment Response

| **Characteristic** | **Treatment Response** | | |
| --- | --- | --- | --- |
| **Total, N = 120** | **Success n = 108** | **Poor n = 12** |
| **Age in years, mean (SD)** | 41.7 (13.5) | 41.2 (13.4) | 45.8 (13.9) |
| **Weight in kilograms, median (IQR)** | 58.5 (52.4, 64.0) | 59.0 (53, 64.8) | 55.6 (46.0, 59.0) |
| **Dietary diversity Score, median (IQR)** | 7.0 (5.4, 9.6 | 7.0 (5.5, 9.6) | 5.6 (4.8, 8.6) |
| **Household size, median (IQR)** | 4.0 (3.0, 7.0) | 4.0 (3.0, 7.0) | 4.0 (2.5, 6.5) |
| **Male sex, n (%)** | 85 (70.8) | 76 (70.4) | 9 (75.0) |
| **Highest Educational Level, n (%)** |  |  |  |
| No formal Education | 23 (19.2) | 20 (18.5) | 3 (25.0) |
| Primary School | 9 (7.5) | 9 (8.3) | 0 (0.0) |
| High School | 81 (67.5) | 72 (66.7) | 9 (75.0) |
| Tertiary | 7 (5.8) | 7 (6.5) | 0 (0.0) |
| **Employment status, n (%)** |  |  |  |
| Unemployed | 32 (26.7) | 28 (25.9) | 4 (33.3) |
| Employed | 77 (64.2) | 69 (63.9) | 8 (66.7) |
| Student | 8 (6.7) | 8 (7.4) | 0 (0.0) |
| Other# | 3 (2.5) | 3 (2.8) | 0 (0.0) |
| **Not married, n (%)** | 65 (54.2) | 61 (56.5) | 4 (33.3) |
| **Facility, n (%)** |  |  |  |
| Komfo Anokye Teaching Hospital | 65 (54.2) | 58 (53.7) | 7 (58.3) |
| Suntreso Government Hospital | 4 (3.3) | 3 (2.8) | 1 (8.3) |
| Kumasi South Hospital | 11 (9.2) | 10 (9.3) | 1 (8.3) |
| Tafo Government Hospital | 4 (3.3) | 4 (3.7) | 0 (0.0) |
| Holy Family Hospital, Techiman | 36 (30.0) | 33 (30.6) | 3 (25.0) |
| **Current alcohol use, n (%)** | 21 (17.6) | 17 (15.9) | 4 (33.3) |
| **Current smoker, n (%)** | 8 (6.9) | 7 (6.7) | 1 (9.1) |
| **Non-adherent (≥ 10% of doses missed), n (%)** | 13 (10.8) | 12 (11.1) | 1 (8.3) |
| **Concomitant non-TB drugs, n (%)** | 46 (38.3) | 42 (38.9) | 4 (33.3) |
| **HIV Co-infected n (%)** | 24 (20.0) | 23 (21.3) | 1 (8.3) |
| **Diabetes Co-morbidity, n (%)** | 9 (7.5) | 8 (7.4) | 1 (8.3) |
| **Severe Smear Grade (3+), n (%)** | 27 (23.7) | 23 (22.5) | 4 (33.3) |

IQR, Interquartile Range; SD, Standard Deviation
