# Supplementary material for: Exposure to the Four First-Line Anti-Tuberculosis Drugs and Treatment Outcomes: A Target Trial Emulation Study in Ghana
Source: Research Square preprint supplement (doi:10.21203/rs.3.rs-9255541/v1), 2026-04-10
Supplement: Supplementary file 2 [file 8b5768bdd375f7dfefc785e7.docx]

**Table S3**: Bivariate analysis of treatment outcomes by Cmax of anti-TB drugs and Incidence rate ratio of treatment outcomes at the end of the continuation phase

| **Characteristics** | **Treatment Outcomes** | | |  | **Failure or Death** | |
| --- | --- | --- | --- | --- | --- | --- |
| **Successful** | **Unsuccessful** | **Total N** |  | **IRR (95% CI)** | **p-value** |
| **n (%)** | **n (%)** |
| **Rifampicin (n = 120)** |  |  |  |  | -ψ |  |
| Normal | 8 (100.0) | 0 (0.0) | 8 |  | - ψ |  |
| Low | 100 (89.3) | 12 (10.7) | 112 |  |  |  |
| **Isoniazid (n = 120)** |  |  |  |  |  | 0.843 |
| Normal | 15 (93.7) | 1 (6.3) | 16 |  | 1 |  |
| Low | 93 (89.4) | 11 (10.6) | 104 |  | 0.79 (0.08, 8.21) |  |
| **Pyrazinamide (n = 120)** |  |  |  |  |  | 0.004 |
| Normal | 92 (95.8) | 4 (4.2) | 96 |  | 1 |  |
| Low | 16 (66.7) | 8 (33.3) | 24 |  | 7.3 (1.89, 28.33) |  |
| **Ethambutol (n = 120)** |  |  |  |  |  | 0.042 |
| Normal | 61 (95.3) | 3 (4.7) | 64 |  | 1 |  |
| Low | 47 (83.9) | 9 (16.1) | 56 |  | 2.22 (1.03, 4.81) |  |
| **Pharmacokinetic Phenotype(n = 120)** | | |  |  |  | 0.004 |
| Adequate exposure | 92 (95.8) | 4 (4.2) | 96 |  | 1 |  |
| Low exposure | 16 (66.7) | 8 (33.3) | 24 |  | 7.3 (1.89, 28.33) |  |

*p < 0.05; ψ Not estimated because normal concentration perfectly predicts successful outcomes; Cmax, peak plasma concentration
