# Supplementary material for: Exposure to the Four First-Line Anti-Tuberculosis Drugs and Treatment Outcomes: A Target Trial Emulation Study in Ghana
Source: Research Square preprint supplement (doi:10.21203/rs.3.rs-9255541/v1), 2026-04-10
Supplement: Supplementary file 3 [file d85151d68a58d53c2690c60b.docx]

**Table S1**: Baseline characteristics of patients included in the emulated target trial versus those excluded because of loss to follow-up or incomplete pharmacokinetic data

| **Characteristics** | **Total N = 164** | **Included n = 120** | **Excluded n = 44** | **Std. Diff** | **p-value**† |
| --- | --- | --- | --- | --- | --- |
| **Age in years, mean (SD)** | 40.6 (13.3) | 41.7 (13.5) | 41.4 (13.4) | -0.08 | 0.655 |
| **Weight in kilograms, median (IQR)** | 58.0 (51.0, 63.3) | 58.5 (52.4, 64.0) | 52.0 (48.0, 60.0) | -0.47 | 0.022 |
| **Dietary diversity Score, median (IQR)** | 6.4 (4.9, 9.0) | 7.0 (5.4, 9.6) | 5.2 (2.2, 7.4) | -0.90 | <0.001 |
| **Household size, median (IQR)** | 5.0 (3.0, 7.0) | 4.0 (3.0, 7.0) | 5.0 (3.0, 9.0) | +0.21 | 0.370 |
| **Male sex, n (%)** | 115 (70.1) | 85 (70.8) | 30 (68.2) | -0.06 | 0.742 |
| **Highest Educational Level, n (%)** |  |  |  | +0.16 | 0.105 |
| No formal Education | 27 (16.5) | 23 (19.2) | 4 (9.1) |  |  |
| Primary School | 17 (10.4) | 9 (7.5) | 8 (18.2) |  |  |
| High School | 109 (66.5) | 81 (67.5) | 28 (63.6) |  |  |
| Tertiary | 11 (6.7) | 7 (5.8) | 4 (9.1) |  |  |
| **Employment status, n (%)** |  |  |  | +0.02 | 0.519 |
| Unemployed | 40 (24.5) | 32 (26.7) | 8 (18.6) |  |  |
| Employed | 110 (67.5) | 77 (64.2) | 33 (76.7) |  |  |
| Student | 10 (6.1) | 8 (6.7) | 2 (4.7) |  |  |
| Other# | 3 (1.8) | 3 (2.5) | 0 (0.0) |  |  |
| **Not married, n (%)** |  |  |  | -0.17 | 0.328 |
| Unmarried | 92 (56.4) | 65 (54.2) | 27 (62.8) |  |  |
| Married | 71 (43.6) | 55 (45.8) | 16 (37.2) |  |  |
| **Facility, n (%)** |  |  |  | -0.46 | <0.001 |
| Komfo Anokye Teaching Hospital | 92 (56.1) | 65 (54.2) | 27 (61.4) |  |  |
| Suntreso Government Hospital | 7 (4.3) | 4 (3.3) | 3 (6.8) |  |  |
| Kumasi South Hospital | 21 (12.8) | 11 (9.2) | 10 (22.7) |  |  |
| Tafo Government Hospital | 7 (4.3) | 4 (3.3) | 3 (6.8) |  |  |
| Holy Family Hospital, Techiman | 37 (22.6) | 36 (30.0) | 1 (2.3) |  |  |
| **Current alcohol use, n (%)** | 31 (19.0) | 21 (17.6) | 10 (22.7) | +0.13 | 0.463 |
| **Current smoker, n (%)** | 9 (5.6) | 8 (6.9) | 1 (2.3) | -0.22 | 0.446 |
| **Non-adherent (≥ 10% of doses missed), n (%)** | 18 (11.0) | 13 (10.8) | 5 (11.4) | +0.02 | 1.000 |
| **Concomitant non-TB drugs, n (%)** | 59 (36.0) | 46 (38.3) | 13 (29.5) | -0.18 | 0.299 |
| **HIV Co-infected, n (%)** | 30 (18.3) | 24 (20.0) | 6 (13.6) | -0.17 | 0.350 |
| **Diabetes Co-morbidity, n (%)** | 11 (6.7) | 9 (7.5) | 2 (4.5) | -0.12 | 0.503 |
| **Severe Smear Grade (3+), n (%)** | 36 (23.1) | 27 (23.7) | 9 (21.4) | -0.05 | 0.474 |

SD, Standard Deviation; Std. Diff, Absolute standardized difference

† Fisher’s exact test or chi-square test for categorical variables, ttest or Wilcoxon rank-sum test for continuous variables
